# Supplementary material for: Estimating the causal effect of embryo transfer day on clinical in vitro fertilization outcomes using propensity score matching
Source: PubMed Central journal article supplement (PMC8364091; doi:10.1186/s12884-021-04013-y), 2021-08-13
Supplement: 12884_2021_4013_MOESM1_ESM.pdf [file 12884_2021_4013_MOESM1_ESM.pdf]

# Supplementary Materials for ”Estimating the Causal Effect of Embryo Transfer Day on Clinical In Vitro Fertilization Outcomes using Propensity Score Matching”

by

HC Hsieh\*, CI Lee\*, EY Lai, JY Su, YT Huang, WL Zheng, CH Chen, CC Huang,  
PY Lin, MS Lee, M Liu, YT Huang

## 0.1 Formula and Derivation of Propensity Score

We formed the following logistic model:

$$\log \frac{P(Y_i = 1 | X_{1i}, \dots, X_{Ji})}{1 - P(Y_i = 1 | X_{1i}, \dots, X_{Ji})} = \beta_0 + \sum_{j=1}^J \beta_j X_{ji}, \quad (1)$$

where  $Y_i$  is subject  $i$  receives Day 5 transfer and 0 if receiving Day 3 transfer, and  $X_{ji}$  is the covariate  $j$  for subject  $i$ .

The propensity score (PS) of subject  $i$  is constructed as:

$$PS_i = \hat{P}(Y_i = 1 | X_{1i}, \dots, X_{Ji}) = \frac{\exp(\hat{\beta}_0 + \sum_{j=1}^J \hat{\beta}_j X_{ji})}{1 + \exp(\hat{\beta}_0 + \sum_{j=1}^J \hat{\beta}_j X_{ji})}, \quad (2)$$

where  $(\hat{\beta}_0, \hat{\beta}_1, \dots, \hat{\beta}_J)$  are the estimates of  $(\beta_0, \beta_1, \dots, \beta_J)$  obtained from fitting the above regression model.
